# Whole-genome sequencing identifies interferon induced protein IFI6 as a strong candidate gene for VNN resistance in European sea bass

Emilie Delpuech<sup>1,2</sup>, Marc Vandeputte<sup>1,2</sup>, Romain Morvezen<sup>3</sup>, Anastasia Bestin<sup>3</sup>, Mathieu Besson<sup>3</sup>, Joseph Brunier<sup>4</sup>, Aline Bajek<sup>4</sup>, Boudjema Imarazene<sup>5</sup>, Yoannah François<sup>1,6</sup>, Olivier Bouchez<sup>7</sup>, Xavier Cousin<sup>1,2</sup>, Charles Poncet<sup>8</sup>, Thierry Morin<sup>6</sup>, Jean-Sébastien Bruant<sup>5</sup>, Béatrice Chatain<sup>1</sup>, Pierrick Haffray<sup>3</sup>, Florence Phocas<sup>2</sup> and François Allal<sup>1</sup>

<sup>1</sup> MARBEC, Univ. Montpellier, Ifremer, CNRS, IRD, INRAE, 34250 Palavas-les-Flots, France

<sup>2</sup> Université Paris-Saclay, INRAE, AgroParisTech, GABI, 78350 Jouy-en-Josas, France

<sup>3</sup> SYSAAF, Station LPGP/INRAE, Campus de Beaulieu, 35042 Rennes, France

<sup>4</sup> Ecloserie Marine de Gravelines-Ichtus, Gloria Maris Groupe, 59273 Gravelines, France

<sup>5</sup> Fermes Marines Du Soleil, 17840 La Brée Les Bains, France

<sup>6</sup> ANSES, Viral Fish Diseases Unit, Technopôle Brest- Iroise, 29280 Plouzané, France

<sup>7</sup> US 1426, GeT-PlaGe, INRAE, Genotoul, Castanet-Tolosan, France

<sup>8</sup> INRAE-UCA, UMR GDEC, 63000 Clermont-Ferrand, France

\*Corresponding author

Email addresses:

[emilie.delpuech@inrae.fr](mailto:emilie.delpuech@inrae.fr) ;

[marc.vandeputte@inrae.fr](mailto:marc.vandeputte@inrae.fr) ;

[romain.Morvezen@inrae.fr](mailto:romain.Morvezen@inrae.fr) ;

[anastasia.bestin@inrae.fr](mailto:anastasia.bestin@inrae.fr) ;

[mathieu.besson@inrae.fr](mailto:mathieu.besson@inrae.fr) ;

[joseph.brunier@ecloserie-emg.com](mailto:joseph.brunier@ecloserie-emg.com) ;

[aline.bajek@ecloserie-emg.com](mailto:aline.bajek@ecloserie-emg.com) ;

[bimarazene@aqualande.com](mailto:bimarazene@aqualande.com) ;

30 [yoannah.francois@inrae.fr](mailto:yoannah.francois@inrae.fr) ;

31 [olivier.bouchez@inrae.fr](mailto:olivier.bouchez@inrae.fr) ;

32 [xavier.cousin@ifremer.fr](mailto:xavier.cousin@ifremer.fr) ;

33 [charles.poncet@inrae.fr](mailto:charles.poncet@inrae.fr) ;

34 [thierry.morin@anses.fr](mailto:thierry.morin@anses.fr) ;

35 [bruant@aqualande.com](mailto:bruant@aqualande.com) ;

36 [chatainbeatrice@gmail.com](mailto:chatainbeatrice@gmail.com) ;

37 [pierrick.haffray@inrae.fr](mailto:pierrick.haffray@inrae.fr) ;

38 [florence.phocas@inrae.fr](mailto:florence.phocas@inrae.fr) ;

39 [francois.allal@ifremer.fr](mailto:francois.allal@ifremer.fr) ;

40

41

42

43

## 44 **Abstract**

### 45 **Background**

46 Viral Nervous Necrosis (VNN) is major disease affecting of European sea bass. Understanding  
47 the biological mechanisms that underlie VNN resistance is thus important for the welfare of  
48 farmed fish and the sustainability of production systems. This study aimed at identifying key  
49 genomic regions and genes that determine VNN resistance in sea bass.

### 50 **Results**

51 We generated a dataset of around 900,000 single nucleotide polymorphisms (SNPs) identified  
52 from whole-genome sequencing (WGS) in the parental generation in two different commercial  
53 populations (pop A and pop B) comprising 2371 and 3428 European sea bass with phenotypic  
54 records for binary survival in a VNN challenge. In each commercial population, three cohorts  
55 were submitted to the redspotted grouper nervous necrosis virus (RGNNV) challenge by  
56 immersion and genotyped on a 57K SNP chip. After imputation of WGS SNPs from their parents,  
57 QTL mapping was performed using a Bayesian Sparse Linear Mixed Model (BSLMM). We found  
58 several QTL regions on different linkage groups (LG), most of which are specific to a single  
59 population, but a QTL region on LG12 was shared by both commercial populations. This QTL  
60 region is only 127 kB wide, and we identified IFI6, an interferon induced protein at only 1.9 kB  
61 of the most significant SNP. An unrelated validation population with 4 large families was used  
62 to validate the effect of the QTL, for which the survival of the susceptible genotype ranges from  
63 39.8 to 45.4%, while that of the resistant genotype ranges from 63.8 to 70.8%.

## 64 **Conclusions**

65 We could precisely locate the genomic region implied in the main resistance QTL at less than  
66 1.9 kb of the interferon alpha inducible protein 6 (IFI6), which has already been identified as a  
67 key player for other viral infections such as hepatitis B and C. This will lead to major  
68 improvements for sea bass breeding programs, allowing for greater genetic gain by using  
69 marker-assisted genomic selection to obtain more resistant fish. Further functional analyses  
70 are needed to evaluate the impact of the variant on the expression of this gene.

71

72

73

74

75

76

77

78

## 79 Background

80 The sustainable development of aquaculture is strongly dependent on the capacity to control  
81 the epidemics that can impact the farms [1]. Viral Nervous Necrosis (VNN), also called viral  
82 encephalopathy and retinopathy (VER), is caused by Nervous Necrosis Virus (NNV), a single-  
83 stranded positive-sense RNA virus. It is a major threat to the marine and freshwater fish farming  
84 industry worldwide causing increased mortality, degradation of feed conversion ratio and of  
85 animal welfare, thus affecting both production and economic viability of farms [2]. Among the  
86 many species affected by this disease [3], the European sea bass can be highly impacted in the  
87 Mediterranean aquaculture industry, due to a warm environment compatible with the  
88 occurrence of VNN [3–6]. This disease can devastate an entire production of particularly  
89 susceptible larvae and juveniles, with a mortality rate that can reach 90% or more, while adults  
90 can also be impacted [3, 7]. Infected fish are mainly recognizable by their abnormal swimming  
91 behaviour [8]. They show severe neurological disorders due to intensive vacuolation of the  
92 retina and the nervous system [9], and a fast mortality peak, usually on the 10th day after  
93 infection with the NNV [10].

94 Vaccination studies were conducted for this disease, and some recently obtained very positive  
95 results [11] but cannot yet be applied on larvae or early juveniles, for which vaccination remains  
96 a challenge [12, 13]. Genetic improvement remains an important potential way to improve  
97 disease resistance in aquaculture in general [14] and specifically to improve VNN resistance  
98 [15]. Recent studies have shown that there is genetic variation in resistance to VNN in European  
99 sea bass with a heritability ranged between 0.26 and 0.43 [10, 16–19]. After validation of the  
100 possibility to select and improve fish for resistance to NNV [14], dissecting the genetic

101 architecture of VNN resistance in several European sea bass populations is a necessary step to  
102 obtain a better understanding of the molecular architecture of infection-resistant fish and to  
103 permit potential marker-assisted selection [20]. For this, genome-wide association studies  
104 (GWAS) have become a powerful tool in genetics and commonly applied in animal breeding  
105 [21, 22] e.g. in different sea bass species and populations for VNN resistance [10, 18, 19, 23].  
106 They reported the identification of quantitative trait loci (QTL) and even the identification of  
107 SNP variants impacting the survival rate of sea bass exposed to NNV. In particular, a QTL was  
108 identified on the LG12 in several populations of European sea bass, indicating a genomic region  
109 of interest for improving VNN survival [10, 18]. However, from these studies the localisation of  
110 this QTL remained unprecise and population dependent, while the implementation of efficient  
111 marker assisted selection requires identifying the causal variant(s) or very tightly linked loci.  
112 With this aim, we imputed whole genome sequence on 5779 sea bass from two French  
113 breeding programs challenged for VNN, and performed a GWAS with a Bayesian Sparse Linear  
114 Mixed Model (BSLMM) to identify the main genomic region of interest, which was then  
115 validated in an independent population.

## 116 **Methods**

### 117 **Ethic statement**

118 All infection challenges were carried out in accordance with the European guidelines (Directive  
119 2010–63-EU) and the corresponding French legislation. Animal experiment procedures were  
120 approved by the ethics committee on animal experimentation COMETH ANSES/ENVA/UPC  
121 No.16 and were authorized by the French Ministry of Higher Education, Research and  
122 Innovation under numbers 2017022816255366, 29/01/13-5 and 10/03/15-1.

## 123 Populations and experimental design

### 124 Discovery populations

125 A total of 5799 European sea bass (*Dicentrarchus labrax*) from commercial populations were  
126 used in our study to identify the QTLs. These animals produced by artificial mating, come from  
127 two different French hatcheries designated as pop A and pop B. The 2371 individuals from pop  
128 A were distributed in three cohorts and the 3428 individuals from pop B were also distributed  
129 in 3 cohorts. So, six cohorts were used in this study, including two cohorts that were previously  
130 studied [10]. To identify the cohorts in the commercial populations, an additional number from  
131 1 to 3 will be added to pop A or pop B.

132 In pop A, the three cohorts were not related and these individuals were distributed as follows:  
133 671 individuals from cohort A\_1, deriving from a partly factorial mating of 56 sires and 19 dams,  
134 650 individuals from cohort A\_2, deriving from a partly factorial mating of 58 sires and 16 dams  
135 and 1050 individuals from cohort A\_3 deriving from a partly factorial mating of 60 sires and 20  
136 dams. All 174 sires of these individuals were sampled for genome sequencing. In pop B, cohorts  
137 1 and 2 were related while cohort 3 was more distantly related. Pop B cohorts included 1083  
138 individuals from cohort B\_1, deriving from a partly factorial mating of 40 sires and 14 dams,  
139 1087 individuals from cohort B\_2, deriving from a partly factorial mating of 41 sires and 15  
140 dams and 1258 individuals for cohort B\_3 deriving from a partly factorial mating of 48 sires and  
141 27 dams. For this population, parents of cohorts B\_2 and B\_3 were all sampled for sequencing  
142 and for cohort B\_1 some pairs of parents were sampled but for a portion of individuals only  
143 one parent (mostly the mothers) had enough DNA to be sequenced. In the end, 159 parents

144 from pop B were sampled for whole-genome sequencing. All this information is reported in  
 145 table 1.

| Population                                                           | pop A |       |       | pop B |       |       | IFREMER    |
|----------------------------------------------------------------------|-------|-------|-------|-------|-------|-------|------------|
| Cohorts                                                              | A_1   | A_2   | A_3   | B_1   | B_2   | B_3   | Validation |
| Average weight                                                       | 8     | 6     | 25    | 31    | 7     | 11    | 8          |
| Average survival rate (%)                                            | 65.4  | 76.3  | 44.6  | 58.7  | 66.5  | 38.6  | 57.7       |
| Number of individuals challenged and genotyped                       | 1146  | 765   | 1148  | 1150  | 1246  | 1480  | 1536       |
| Number of individuals challenged and genotyped passing filters       | 1015  | 652   | 1051  | 1096  | 1182  | 1293  | 1520       |
| Number of parents (Sire/Dam)                                         | 56/19 | 58/16 | 60/20 | 40/14 | 41/15 | 48/27 | 4/4        |
| Number of parents sequenced (Sire/Dam)                               | 56/0  | 58/0  | 60/0  | 20/9  | 41/15 | 48/26 | 4/4        |
| Number of individuals genotyped with sequenced parents               | 671   | 650   | 1050  | 1083  | 1087  | 1258  | 1334       |
| Total of individuals genotyped with sequenced parents per population | 2371  |       |       | 3428  |       |       | 1334       |

146 *Table 1: Description of the sampling strategy applied for each of the two commercial*  
 147 *populations and for the validation population challenged for VNN.*

148 European sea bass from the commercial cohorts were challenged for VNN on the SYSAAF-  
 149 ANSES Fortior Genetics platform (ANSES, Plouzané, France). For all challenges, fish were  
 150 maintained in filtered seawater at a temperature of 27 °C ± 2 °C in a flow-through system.  
 151 Infectious challenges were performed separately but in the same manner for all cohorts. All  
 152 fish sent to the infectious challenge were individually tagged with RFID glass tags. The fish were  
 153 acclimatized for a period of three weeks before the challenge was performed. To summarize,  
 154 infection with the redspotted grouper nervous necrosis virus (RGNNV) strain W80 was  
 155 performed in a static bath of aerated seawater containing 1 × 10<sup>5</sup> TCID<sub>50</sub>/ml of the virus.



156 Mortality was recorded daily during the challenge period which was 27 days for pop A and 42  
157 days for pop B. To confirm the presence of the NNV virus in dead fish and eliminate the possible  
158 impact of unwanted bacterial coinfections, bacteriological and viral analyses were performed  
159 during the challenges and during the peak of mortality.

160 Validation population

161 For the validation part, four experimental full-sib families challenged for VNN were used. These  
162 families have already been described and studied by Griot et al. 2021 [10], namely NEM10,  
163 NEM12, SEM8 and WEM18. These individuals were then challenged for VNN following the same  
164 method used for the commercial populations. In total, 1536 European sea bass from these  
165 families were challenged for NNV resistance for 33 days. Its challenge results were used for the  
166 validation of the results obtained from the commercial cohorts. So, statistically these four  
167 experimental full-sib families constitute the validation population. All eight parents of these  
168 four families were sampled for whole genome sequencing.

### 169 **Whole-genome sequencing and variant calling**

170 A total of 333 parents of individuals challenged for resistance to VNN were collected to obtain  
171 whole-genome sequencing (WGS) data. For commercial populations, 174 parents from pop A  
172 and 159 parents from pop B were sequenced. In addition, the 8 parents of the validation  
173 population were also sequenced (see details in Table 1). The genomic DNA was extracted using  
174 the standard phenol–chloroform protocol from the parents' pectoral fin biopsies at the GeT-  
175 PlaGe core facility, INRAE Toulouse, to perform DNA sequencing. DNA-seq libraries were  
176 prepared according to Illumina's protocols using the Illumina TruSeq Nano DNA HT Library Prep  
177 Kit. Briefly, DNA was fragmented by sonication, size selection was performed using SPB beads

178 (kit beads), and adaptors were ligated for traceability and sequencing. Library quality was  
179 assessed using a Advanced Analytical Fragment Analyzer and libraries were quantified by QPCR  
180 using the Kapa Library Quantification Kit. DNA-seq experiments were performed on an Illumina  
181 NovaSeq6000 using a paired-end read length of 2x150 pb with the Illumina NovaSeq6000  
182 Reagent Kits.

183 The obtained sequencing reads were aligned to the European sea bass reference genome  
184 consisting of 24 linkage groups (LG) (seabass\_V1.0) using the Burrows-Wheeler Aligner (BWA,  
185 v.2.1) method with default parameters [24]. Duplicates were marked with Picard  
186 (<http://broadinstitute.github.io/picard> v.2.21.1). After mapping, SNPs and InDels were called  
187 using the DeepVariant (v.1.1.0) tool [25] to keep all types of variants present in the analyzed  
188 populations. Next, the dataset identifying SNPs with quality greater than 30 and with a coverage  
189 higher than 4 was kept using BCFtools (v.1.13) [26]. A second step of filtering was performed  
190 with the PLINK software (v.1.9) [27, 28] to remove SNPs with: (1) a missing call rate higher than  
191 10%, (2) a minor allele frequency (MAF) lower than 1% and (3) more than two alleles identified.  
192 Finally, the output VCF files were converted to plink format and were coded as 0, 1 and 2  
193 corresponding respectively, to the homozygous genotype for the reference allele from the  
194 published genome (seabass\_V1.0), heterozygous genotype and homozygous genotype for the  
195 alternative allele.

## 196 **SNP chip genotyping and imputation to whole-genome sequences**

197 Samples from challenged cohorts were genotyped for 56,730 SNPs using the ThermoFisher  
198 Axiom™ Sea Bass 57k SNP array DlabChip, at the Gentyane genotyping platform (INRAE,  
199 Clermont-Ferrand, France). A total of 3059 and 3876 individuals were genotyped in pop A and

200 pop B, respectively. In the validation population, a total of 1536 individuals were also genotyped  
201 with the same chip. Then, SNP calling was done using ThermoFisher's AxiomAnalysisSuite™  
202 software to identify genotypes at each probe set. Preliminary quality controls were applied with  
203 cutoff values of 95% for SNP calling rate, 90% for sample calling, and the "Run PS Supplemental"  
204 option was used to regenerate SNP Metrics to select SNPs identified polymorphic by the  
205 software. With the PLINK software, two other filtering were applied on genotypes of challenged  
206 individuals within commercial populations: remove SNPs with a MAF less than 5% and SNPs  
207 with a p-value for the Hardy-Weinberg test less than a threshold of  $10^{-8}$ . The output VCF files  
208 were converted to plink format and were coded as 0, 1 and 2 corresponding respectively, to  
209 reference allele from the published genome (seabass\_V1.0), heterozygous and alternative  
210 allele. Parentage assignment was performed using 1000 sampled markers (with a MAF around  
211 0.5) with the APIS R package [29] with a positive assignment error rate set at 1%, to assign all  
212 challenged sea bass to their sequenced parents.

213 Imputation of the WGS SNPs to the offspring genotyped with the 57k SNP array DlabChip was  
214 performed using the FImpute software (v.3) [30], accounting for pedigree information. SNPs  
215 identified from the WGS variant calling of the parents were used as reference and the 57K  
216 genotypes of the challenged offspring were used as target in each population analyzed (pop A,  
217 pop B and validation population).

218 To perform the most efficient approach in both commercial populations, a subset of the  
219 imputed WGS SNPs was created. Two successive filters were applied to be on the same set of  
220 SNPs across populations and to avoid redundancy among SNPs. First, we retained common  
221 SNPs between the two commercial and the validation populations, secondly, we filtered within

222 population the remaining SNPs based on linkage disequilibrium calculated between all pairs of  
223 SNPs with an upper limit set to  $r^2=0.8$  within a 200 kb windows in PLINK; and finally reselecting  
224 common SNPs after filtering on linkage disequilibrium in each population.

## 225 Bayesian sparse linear mixed model for genome wide association studies

226 GWAS was based on a Bayesian Sparse Linear Mixed Model (BSLMM) that assumes that all SNPs  
227 have at least a relatively small effect, but also that a few SNP may have a large effect [31].  
228 Therefore, BSLMM is capable of adapting to different genetic architectures of the studied trait,  
229 from the infinitesimal polygenic model to a model which assumes that only a very small  
230 proportion of all variants affect the phenotype. The general model can be presented as follows:

$$231 \quad \mathbf{y} = \mathbf{1}_n \mu + \mathbf{X} \boldsymbol{\beta} + \mathbf{u} + \boldsymbol{\varepsilon}$$

232 where  $\mathbf{1}_n$  is an  $n$ -vector of 1s,  $\mu$  is a scalar representing the phenotype mean,  $\mathbf{X}$  is an  $n \times p$  matrix  
233 of genotypes measured on  $n$  individuals at  $p$  SNPs,  $\boldsymbol{\beta}$  is the corresponding  $p$ -vector of the SNP  
234 effects;  $\mathbf{u}$  is a vector of random additive genetic effects distributed according to  $\mathcal{N}(\mathbf{0}, \mathbf{K} \sigma_b^2)$ ,  
235 with  $\sigma_b^2$  the additive genetic variance and  $\mathbf{K}$  the genomic relationship matrix; and  $\boldsymbol{\varepsilon}$  is a  $n$ -vector  
236 of residuals  $\mathcal{N}(\mathbf{0}, \mathbf{I} \sigma_e^2)$ ,  $\sigma_e^2$  is the variance of the residual errors. Assuming  $\mathbf{K} = \mathbf{X} \mathbf{X}^T / p$ , the SNP  
237 effect sizes can be decomposed into two parts:  $\alpha$  that captures the small effects that all SNPs  
238 have, and  $\beta$  that captures the additional effects of some large effect SNPs. In this case,  $\mathbf{u} = \mathbf{X} \boldsymbol{\alpha}$   
239 can be viewed as the combined effect of all small effects, and the total effect size for a given  
240 SNP is  $\boldsymbol{\gamma}_i = \alpha_i + \beta_i$ . The individual SNP effects  $\boldsymbol{\gamma}_i$  are sampled from a mixture of two normal  
241 distributions,  $\boldsymbol{\gamma}_i \sim \pi \mathcal{N}(0, \sigma_a^2 + \sigma_b^2) + (1 - \pi) \mathcal{N}(0, \sigma_b^2)$  where  $\sigma_b^2$  is the variance of small additive genetic  
242 effects,  $\sigma_a^2$  is the additional variance associated to large effects and  $\pi$  is the proportion of SNPs  
243 with large effects.

244 In our study, the BSLMM was implemented using Genome-Wide Efficient Mixed Model  
245 Association (GEMMA) software [31]. For a more accurate study of the VNN survival trait, this  
246 binary trait was adjusted by the cohort effect in each population effect using a linear model.

247 Within each population, the GWAS was performed by combining data from the 3 cohorts to  
248 increase the power of the analysis. In GEMMA, we applied a linear BSLMM model using MCMC  
249 as proposed by Zhou et al [31] for the survival trait. A total of 5 million iterations (-s option)  
250 were performed with a burn-in of 100,000 steps and we recorded one state in every 10  
251 iterations for further analysis. In addition, to ensure convergence of the distribution of the  
252 hyper-parameter  $\pi$ , the minimum and maximum numbers of SNPs that was sampled to be  
253 included be included in the model were set to 5 (-smin option) and 100 (-smax option),  
254 respectively. These threshold values were based on an initial run with default values indicating  
255 median numbers of about 20 SNPs as showing a large effect.

## 256 QTL region and annotation

257 BSLMM uses a Markov chain Monte Carlo algorithm to sample from the posterior distribution  
258 to obtain all parameters values, among which the SNP effect estimates  $\tilde{\beta}$ , but also the hyper-  
259 parameter  $\pi$  and a posterior inclusion probability (PIP) for each SNP that indicates the  
260 proportion of samples in which that SNP is classified as having a large effect. This proportion  
261 can be used for QTL mapping as it indicates the strength of the evidence that the SNP has to be  
262 included in the model. In other words, SNPs that are most robustly associated with the  
263 phenotype are therefore expected to have large PIPs. Following Barbieri and Berger [32],  
264 regions with a PIP above 0.5 were selected (since SNPs from these regions are included in the  
265 model in the majority of iterations). As a complementary approach, to define a less stringent  
266 threshold, Stephens and Balding [33] proposed to calculate a Bayes Factor (BF) as follow :

$$267 \quad BF = \frac{\frac{PIP}{(1-PIP)}}{\frac{\pi}{(1-\pi)}}$$

268 As proposed by Kass and Raftery [34], the natural logarithm transformation of the BF (logBF)  
269 was computed as twice the natural logarithm of the BF. This logarithmic scale produced values  
270 within the same range as usual likelihood ratio test values, thus facilitating the determination  
271 of thresholds to define QTLs. A threshold  $\logBF \geq 10$  was used for defining very strong evidence  
272 for a QTL according to Michenet et al. [35]. The BSLMM results were visualized via a Manhattan  
273 plot where all negative values for logBF were set to 0. Credibility intervals were determined  
274 using the threshold  $\logBF \geq 10$  for defining a peak SNP showing strong evidence for a QTL. The  
275 credibility interval included every SNP with a  $\logBF > 5$  within a 100 kb sliding window from the  
276 peak SNP. This procedure was repeated for each of the identified QTL regions.

277 To determine how QTL regions affected VNN resistance, the effects of SNPs characterizing each  
278 region on population survival rate were analyzed. For this purpose, we corrected the survival  
279 rate results by cohort in each population in order to be able to compare all challenges between  
280 them. Thus, we standardized all challenges to a survival rate of 50% after a probit  
281 transformation, and then, the percent survival of each genotype at a QTL was recalculated in  
282 each cohort. Finally, we averaged these survival rates by cohorts to facilitate the discussion of  
283 the results.

284 The next step was to perform a functional analysis of the QTL region identified, to link variants  
285 detected in the whole-genome sequencing of parents with the annotation of the European sea  
286 bass. All annotated genes positioned in the QTL region were reported. To understand the role  
287 of the variants in the coding regions of identified genes, all SNPs identified from the variant  
288 calling were annotated based on the UCSC annotation [36] of the European sea bass reference  
289 genome with SnpEff software (v.5.0) and default parameters [37]. SnpEff annotates variants in

290 the VCF files based on their position and the reference annotation. The polymorphisms were  
291 classified per variant type as coding or non-coding, then the impact of each was identified from  
292 high to low, and the functional class was assigned to them as non-synonymous or synonymous  
293 (silent) SNPs. As we know that the causative mutation may not be the most significant variant  
294 in GWAS analyses, for the non-coding regions, Ensembl Variant Effect Predictor (VEP) software  
295 of Ensembl was used to understand the role of variants positioned between genes [38]. The  
296 VEP provides methods for a systematic approach to annotate and prioritize variants in large-  
297 scale sequencing analysis, using transcripts, regulatory regions, frequencies from previously  
298 observed variants, citations, clinical significance information, and predictions of biophysical  
299 consequences of variants.

300



## 301 Results

### 302 VNN phenotypes

303 The six challenges were conducted up to 40 days for the six commercial cohorts. NNV presence  
304 was confirmed by viral analyses on several subsets of dead fish during the infection, on which  
305 the absence of significant bacterial coinfection was also confirmed. Survival rates ranged from  
306 44.5% to 76.3% for pop A cohorts and from 38.6% to 66.5% for pop B cohorts. For the validation  
307 population, the average survival rate was 56% (Table1). The peak of mortality was between 5  
308 and 15 days after infection for all seven commercial and validation cohorts (Figure 1).

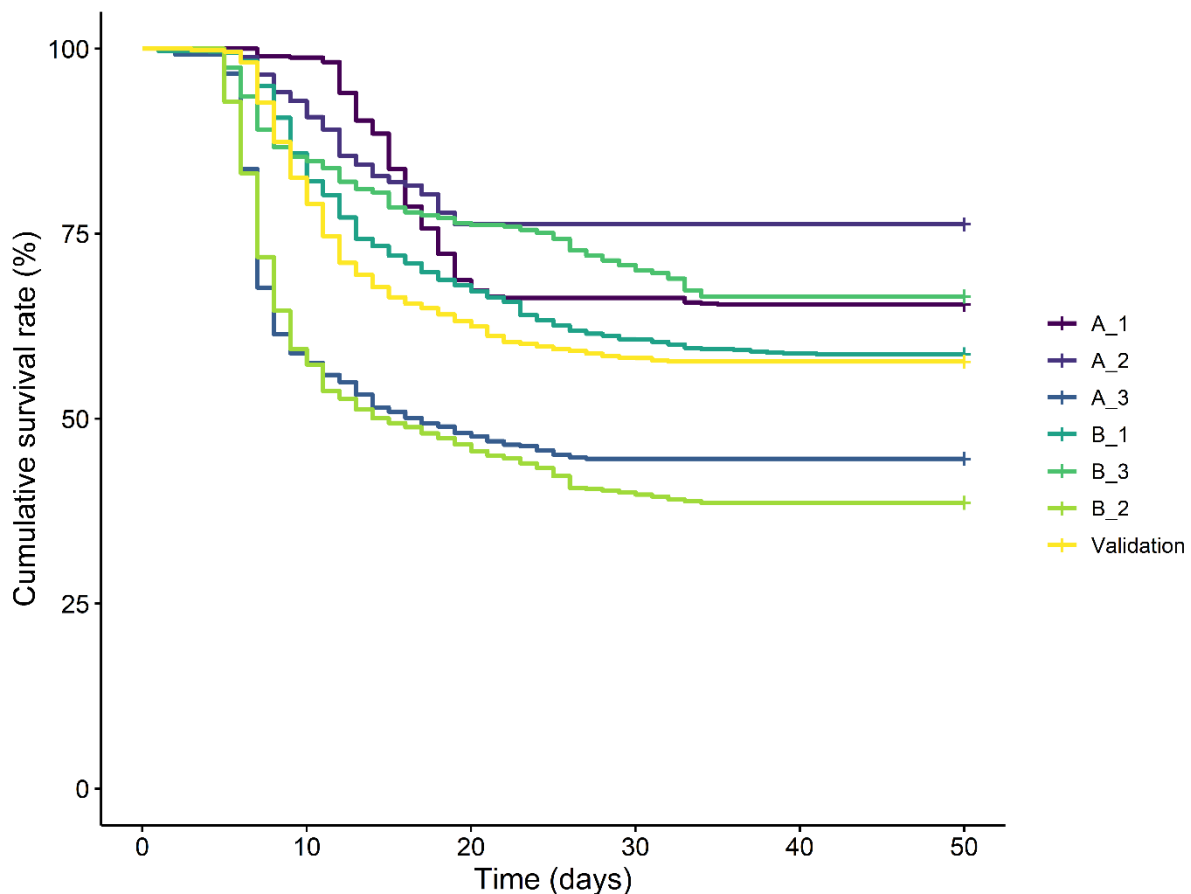

309

310 *Figure 1: Evolution of the Kaplan-Meier cumulative survival rate for each of the 3 cohorts*  
311 *characterizing the two commercial populations, via a purple gradient for pop A (A\_1, A\_2, A\_3)*  
312 *and a green gradient for pop B (B\_1, B\_2, B\_3), during their respective VNN infection challenge.*  
313 *The results for the validation population are also plotted in yellow.*

## 314 From whole-genome sequences to imputed whole-genome variants

315 We generated WGS at an average coverage of 19-fold for 174 sires of pop A, 159 parents (126  
316 sires and 53 dams) of pop B and 8 parents (4 sires and 4 dams) of the validation population.  
317 Variant calling data were available for all these fish and identified around 8 million raw variants.  
318 The quality control of the WGS SNPs was first carried out for each commercial population and  
319 the validation population. All individuals sequenced and considered in this study were kept. The  
320 number of SNPs removed by MAF (lower than 10%), SNP call rate (lower than 95%) and Hardy-  
321 Weindberg ( $p\text{-value} > 10^{-8}$ ) filters are reported in Table S1. In total, 2,506,457 WGS filtered SNPs  
322 were kept in the 174 sequenced animals from pop A, 2,436,691 WGS SNP were kept in the 159  
323 sequenced animals from pop B and 2,392,123 WGS SNP were kept in the validation population.  
324 From the 5799 57K genotypes obtained in pop A and pop B respectively, 688 and 277 animals  
325 were removed with a call rate threshold of 90% and based on pedigree data i.e. keeping only  
326 those individuals that were challenged and had at least one parent sequenced. After SNPs  
327 filtering, following the MAF (lower than 10%), call frequency filters (lower than 95%) and the  
328 Hardy–Weinberg equilibrium filter, 40,743 SNPs and 36,862 SNPs were kept. Thus, for the 57k  
329 SNP array DlabChip, genotypes of 2371 pop A animals for 40,743 SNPs and genotypes of 3428  
330 pop B animals for and 36,862 SNPs were retained for further analyses.  
331 After the imputation step for the commercial populations, we obtained 2,506,457 and  
332 2,436,691 imputed WGS SNPs for 2371 and 3428 challenged animals in pop A and pop B,  
333 respectively. Based on an  $r^2 > 0.8$  in 200 kb windows, 1,457,298 WGS SNPs and 1,457,105 WGS  
334 SNPs were retained for pop A and pop B respectively. Finally, to perform GWAS on commercial

335 populations, a common subset of SNPs after applying the LD filters performed in each  
 336 population, was created and was characterized by 838,451 imputed WGS SNPs.

### 337 QTL detection for VNN resistance

338 The estimates of the genomic heritability ( $h^2$ ) of binary survival on the observed scale were 0.22  
 339 in pop A and 0.21 in pop B, combining the 3 cohorts in each commercial population. The  
 340 estimation of the proportion of genetic variance explained by the polygenic effect represented  
 341 61% of the total genetic variance in pop A and 62% in pop B. In the BSLMM association analysis,  
 342 11 QTL regions in pop A and 12 QTL regions in pop B were identified as having large effects on  
 343 the VNN resistance, meaning very strong evidence was found for these QTL (Table 2). In pop A,  
 344 QTL were detected with strong evidence in LG1A, LG3, LG4, LG7, LG8, LG12, LG15, LG22-25 and  
 345 LGx. In pop B, QTL detected with strong evidence were positioned in LG1B, LG7, LG8, LG9, LG12,  
 346 LG13, LG14 and LG15 (Figure 2).

| QTL-ID     | LG   | MIN-POS (bp) | MAX-POS (bp) | PIP  | logBF | Population  |
|------------|------|--------------|--------------|------|-------|-------------|
| LG1A_QTL   | LG1A | 10,107,908   | 10,111,686   | 0.02 | 10.3  | pop A       |
| LG1B_QTL   | LG1B | 13,152,351   | 13,885,885   | 0.04 | 10.9  | pop B       |
| LG3_QTL    | LG3  | 10,137,843   | 10,137,843   | 0.03 | 10.6  | pop A       |
| LG4_QTL    | LG4  | 23,334,300   | 23,618,451   | 0.22 | 15.2  | pop A       |
| LG7_QTL_1  | LG7  | 7,828,421    | 7,828,421    | 0.03 | 10.6  | pop B       |
| LG7_QTL_2  | LG7  | 21,062,741   | 21,062,741   | 0.03 | 10.9  | pop A       |
| LG8_QTL_1  | LG8  | 1,423,728    | 3,198,660    | 0.38 | 16.4  | pop A/pop B |
| LG8_QTL_2  | LG8  | 20,789,708   | 22,055,049   | 0.05 | 12.0  | pop A       |
| LG9_QTL    | LG9  | 4,532,879    | 6,335,544    | 0.18 | 14.4  | pop B       |
| LG12_QTL_1 | LG12 | 4,717,307    | 7,246,406    | 0.20 | 14.6  | pop A/pop B |
| LG12_QTL_2 | LG12 | 8,671,217    | 8,797,942    | 0.59 | 18.5  | pop A/pop B |
| LG12_QTL_3 | LG12 | 9,118,505    | 9,821,502    | 0.36 | 16.2  | pop A/pop B |
| LG12_QTL_4 | LG12 | 12,167,000   | 19,133,722   | 0.30 | 16.0  | pop A/pop B |
| LG13_QTL   | LG13 | 11,019,998   | 11,019,998   | 0.15 | 14.0  | pop B       |
| LG14_QTL   | LG14 | 26,274,292   | 26,276,196   | 0.07 | 12.1  | pop B       |
| LG15_QTL   | LG15 | 5,885,758    | 5,885,758    | 0.04 | 11.0  | pop B       |

|                    |         |            |            |      |      |       |
|--------------------|---------|------------|------------|------|------|-------|
| <b>LG15_QTL</b>    | LG15    | 24,678,361 | 24,678,361 | 0.07 | 12.3 | pop B |
| <b>LG22-25_QTL</b> | LG22-25 | 4,185,377  | 4,185,377  | 0.03 | 10.5 | pop A |

347 *Table 2: List of QTL regions identified in the BSLMM analysis ranked according to their position*  
348 *on the genome (LG=Linkage Group ; PIP=Posterior Inclusion Probability ; POPULATION=*  
349 *population identification of the QTL region).*

350 When results of both commercial populations were compared, several close significant SNPs  
351 were detected with strong effect on LG8 and LG12 in both commercial populations First, on  
352 LG8 a QTL region was identified as shared between the two commercial populations between  
353 1,423,728 bp and 3,198,660 bp (LG8\_QTL\_1). This QTL explained 2.6% of the total genetic  
354 variance in pop A and 3.1% Then, several QTL regions were identified on LG12 as shared  
355 between the two populations. Based on the logBF value, 4 different QTL regions were  
356 identified: LG12\_QTL\_1 from 4,717,307 pb to 7,246,406 pb, LG12\_QTL\_2 from 8,671,217 pb to  
357 8,797,942 pb, LG12\_QTL\_3 from 9,118,505 pb to 9,821,502 pb and LG12\_QTL\_4 from  
358 12,167,000 pb to 19,133,722 pb. The LG12\_QTL\_2 QTL region was detected with a major effect  
359 in both commercial populations and this region had a length of 126,725 pb. The major SNP of  
360 this QTL region explained 21.8% of the total genetic variance in pop A and 20.3% in pop B. For  
361 all others QTL regions, the major SNPs explained a low proportion of genetic variance (less than  
362 2%).

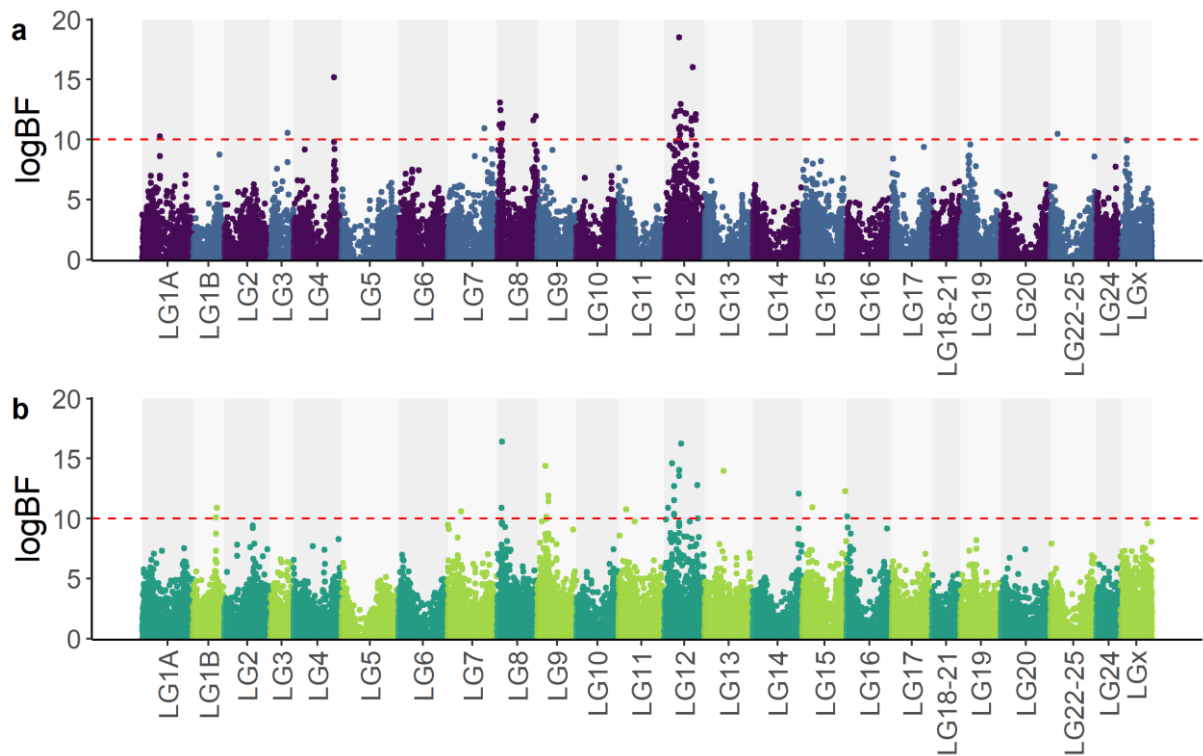

363

364 *Figure 2: Manhattan plot of BSLMM results with logBF scale for VNN resistance in European sea*  
365 *bass populations pop A (a) and pop B (b). The red dashed line represents the logBF threshold of of*  
366 *10, corresponding to strong evidence for the presence of a QTL.*

367

### 368 **LG12 QTL effect and candidate genes**

369 Survival rates were calculated for the different genotypes of the SNP with the highest logBF  
370 value of each of LG12\_QTL\_2. Survival rates were studied in each of the commercial  
371 populations as well as in the validation populations. On figure 3, resistant genotypes were  
372 annotated “RR”, “RS” and “SS” for resistant, heterozygous and susceptible genotypes at  
373 LG12\_QTL\_2. In pop A, an average of 78% survival for the resistant genotype was reported,  
374 while this value drops to 40.6% survival with the susceptible genotype. In pop B, resistant and  
375 susceptible genotypes were associated with 66.2% and 45.4% survival, respectively. Survival  
376 rate was very similar in the validation populations, with a survival of 39.87% for the susceptible  
377 genotype while it was 63.8% for the resistant genotype. Among all other QTL regions identified

378 on LG12, the SNP with the strongest association showed a significant impact on survival rate  
379 impact on the survival rate only in the population where it was detected, especially for  
380 QTL\_LG12\_1 and QTL\_LG12\_3 (data not shown).

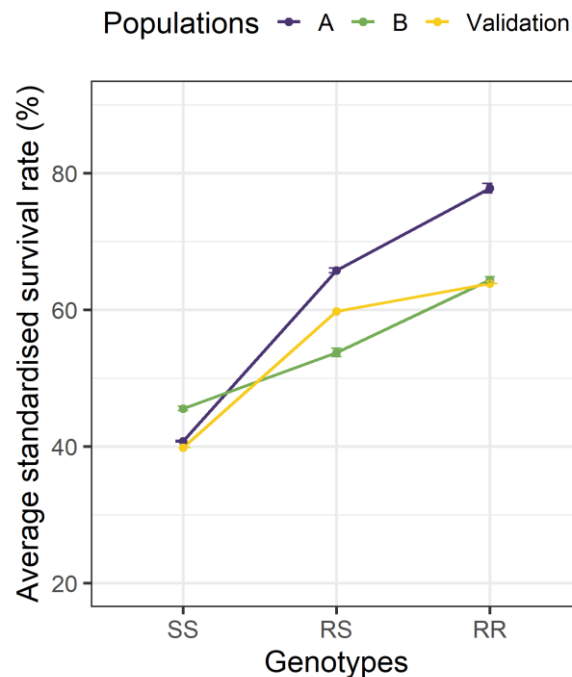

381

382 *Figure 3: Average standardised survival rate for the SNP with higher logBF in LG12\_QTL\_2*  
383 *detected with the BSLMM approach. Each point corresponds to a weighted mean of the average*  
384 *survival rate found in each commercial population cohorts. The standard deviation of survival*  
385 *among the three cohorts in a population was reported for each population.*

386 The list of genes positioned in LG12\_QTL\_2 was obtained from the UCSC genome annotation  
387 (Figure 4). Two different genes were in that region for IFI6 coding for an interferon alpha  
388 induced protein and ZDHHC14 coding for a zinc finger palmitoyltransferase. The IFI6 is  
389 composed of 4 exons on 903 pb and the second gene identified is ZDHHC14, characterized by  
390 9 exons distributed on 44.4 kb. These genes are respectively positioned at 1.9 kb and 6 kb from  
391 the SNP with the highest logBF of the LG12\_QTL\_2.

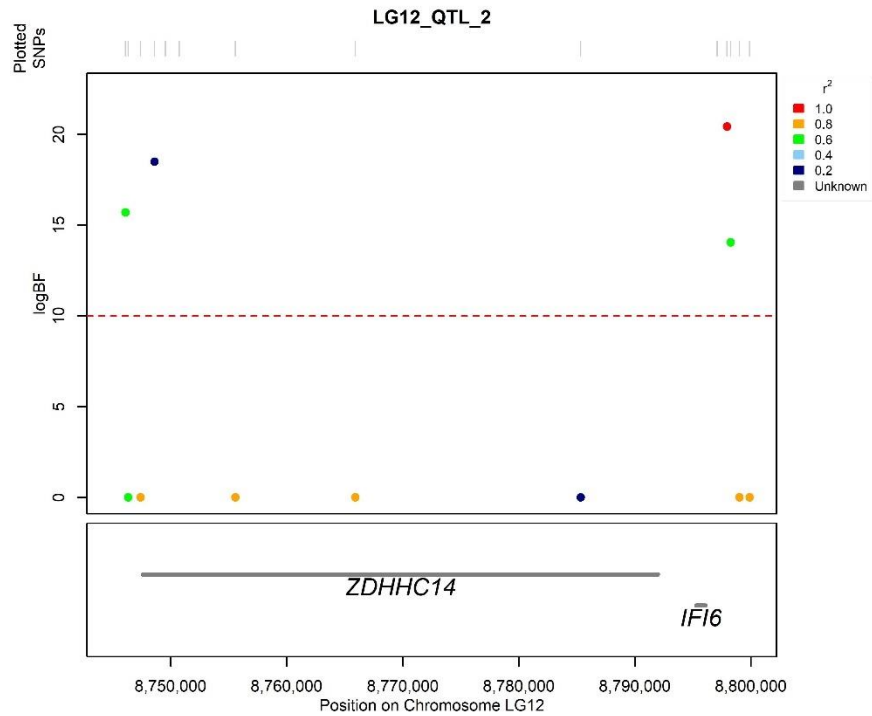

392

393 *Figure 4: Focus on the LG12\_QTL\_2 region with positioning of SNPs on the genome and*  
394 *identification of genes in the region. The graph displays the logBF value on the y-axis and the*  
395 *physical position on the x-axis. Each point represents a variant of the QTL region, they are*  
396 *colored according to their LD  $r^2$  with the characteristic variant of this QTL (red point). The red*  
397 *dashed lines indicate the logBF=10 threshold*

398

399

400

## 401 Discussion

402 In the present study, we aimed to use a combination of whole genome sequencing, 57K  
403 genotyping, GWAS approaches to identify QTLs and then used public functional annotation to  
404 characterize these QTLs influencing VNN resistance in European sea bass.

405 Our results show that heritability estimates for VNN survival using imputed genotypes (0.21-  
406 0.22 on the observed scale) are of the same magnitude as values obtained in previous studies  
407 on NNV-infected sea bass, 0.08 to 0.23 on the observed scale in [10, 23] and 0.15 to 0.43 on  
408 the liability scale in [18, 39]. The number of breeders used to obtain challenged individuals as  
409 well as the number of experimental individuals, the method of infection during viral challenges,  
410 the age and size at challenge and the genetic origin and/or the experimental design are  
411 parameters that may explain the differences between the estimates of NNV survival in these  
412 studies [39].

413 Previous studies on the genetic architecture of VNN resistance revealed several regions  
414 characterized by the significance of one or more SNPs. The majority of the reported QTLs are  
415 putative QTLs with a defined chromosome-wide significance threshold. Through RAD  
416 sequencing, Palaiokostas et al [18] identified putative QTLs on chromosomes 3, 20 and 25 but  
417 the nomenclature used not match with the LGs used in our study. Nevertheless, after  
418 performing Blast on the European sea bass reference genome (seabass\_V1.0) for the identified  
419 regions, we found that these QTLs were positioned on LG6 (for which we found no QTL) and  
420 LG12 (where we found three QTLs). Through the 57k SNP array DlabChip, Griot et al [10]  
421 identified, with a Bayesian approach, 7 putative QTL regions (LG3, LG8, LG14, LG15, LG19 and  
422 LG20) and a large QTL on LG12 in commercial populations A and B, and confirmed large QTL on



423 LG12 in three Ifremer experimental families with an interval mapping approach. One highly  
424 significant QTL was reported to be shared between the different populations studied on LG12.  
425 More recently, Vela-Avitúa et al [23] also identified a high QTL effect in LG12 on a 7 Mb region,  
426 also using the 57k SNP array DlabChip in a different population. Thus, LG12 seems to be of  
427 special interest as a QTL was found on this chromosome in all studies and populations, except  
428 in one experimental family in [10].

429 Whole genome sequencing of the parents of 57K genotyped offsprings were retrieved in order  
430 to finely map SNPs and Indels to identify candidate genes for VNN resistance. Sequence variants  
431 from European sea bass genomes contain more causative mutations than the SNP genotyping  
432 arrays available for this species, making our study more robust for detecting the causal  
433 mutation. The interest of sequence data for trait mapping questions in animal breeding was  
434 uncovered in the 1000 bull genomes program [40]. In the present study, we conducted the  
435 whole-genome association studies for VNN survival using the imputed sequence data, and  
436 Bayesian fine mapping was performed to accurately map candidate variants with a binary trait.  
437 Several QTL regions were identified in the two commercial populations studied, with a majority  
438 of candidate regions revealed only in one population. Indeed, when we studied the survival  
439 rates associated to the genotypes of the majors SNPs in these regions, they had an effect on  
440 VNN survival only in the population in which they were detected. The only SNP that had a strong  
441 association with survival in both populations was the one of LG12\_QTL\_2. The effect of  
442 LG12\_QTL\_2 was further validated using the unrelated validation population where the survival  
443 rates also show a fairly significant effect linked to the resistant and susceptible genotypes at  
444 this SNP (Figure 3). The SNP characterizing this LG12 QTL shows a survival rate increasing from  
445 40% for the susceptible genotype to nearly 80% for the resistant genotype in population A, thus

446 marking a strong impact of this QTL in the fine mapping of the VNN resistance trait. In  
447 population B, the survival rate for the susceptible genotype is 45% but the survival rate is 64%,  
448 slightly less strong, for the resistance genotype. The figures in the validation population are  
449 40% survival for the susceptible genotype and 64% for the resistance genotype. For the other  
450 SNPs present in the window of 127 kb, the survival rates show the same profile for the three  
451 populations as the SNP shared between the two commercial populations. In contrast, the two  
452 QTLs present at the ends of LG12 appear to be characteristic of a single population. It is  
453 therefore interesting to focus on the genomic region shared by both commercial populations.  
454 Nevertheless, finding the causal variants underlying the QTLs is a very difficult task, and  
455 therefore, very few causal variants have been identified to date. Using sequence data, we were  
456 able to refine the QTL region associated with VNN resistance and thus map the genes present  
457 at these positions. Nevertheless, prioritization of the putative causal genes is challenging with  
458 the current state of annotation of the European sea bass genome, which counts 23,382 coding  
459 genes and 35,707 transcribed genes [36].

460 Despite these limitations, the genes underlying the QTL region, i.e., the 127 kb region spanning  
461 the most significant SNP positions, were searched using the European sea bass genome  
462 (seabass\_V1.0 [36]). The QTL region contained two genes separated by 3.6 kb, ZDNNH and IFI6  
463 were identified as strong candidates for LG12 QTLs. The annotation of these 3 genes is  
464 conserved in several animal species and notably in fish. None of these genes have been  
465 previously reported in the literature in view of association studies for survival to VNN.  
466 Interestingly, LG12\_QTL\_2 and these two genes are located more than 2.5 Mb away from the  
467 QTL region identified by Vela-Avitúa et al. [23] and where the HSP70 gene is located, which was  
468 also reported in a transcriptomic analysis of response to VNN in Asian sea bass [41]. This may

469 be a consequence of the much higher precision of our localisation, as the LG12\_QTL\_2 region  
470 is only 127 kb, while the region identified in [22] is 7 Mb wide. For the difference with a  
471 transcriptome study, the transcriptome identified differentially expressed genes, but in the  
472 study of [41] they compared infected and non-infected cell lines, thereby revealing genes  
473 triggered by infection, but which are not necessarily (and indeed not likely) the ones implied in  
474 disease resistance. Another difference is the way the infectious challenges are performed.  
475 Indeed, we have privileged an infection by the VNN via the contamination of the circulating  
476 water in the batch, i.e. we find the presence of the virus in the aquatic environment as  
477 encountered by the fish in rearing facilities (tanks, sea cage), whereas Vela-Avitúa et al. [23]  
478 have preferred a contamination by injection. Thus, the defence mechanisms involved in the  
479 immune response of fish may be different and therefore the gene regions highlighted by GWAS  
480 may also be different. As for the variants identified in our study, two are located in the coding  
481 region of the ZDNNH gene, which codes for a palmitoyltransferase that could catalyze the  
482 addition of palmitate onto various protein substrates. A recent study linked this reaction with  
483 the inhibition of NNV in-vitro, this study showed that protein palmitoylation and phospholipid  
484 synthesis, that involve lipid metabolism, were crucial for RGNNV replication [42]. However, the  
485 precise mechanism by which fatty acid metabolism is involved in RGNNV infection has yet to  
486 be resolved. Considering the symptoms affecting sea bass following a nodavirus infection, we  
487 can detect necrotized nerve cells with lipid droplets and also lesions in the liver and spleen  
488 tissues [15]. It is thus an interesting gene that deserves to be analysed in a more precise way  
489 via functional analyses. It is also interesting to see where the other variants of the region are  
490 positioned, and in particular the one presenting the strongest effect on the survival rate. This  
491 variant is positioned at 3,7 kb downstream of IFI6, an interferon inducible protein. This is an

492 interesting candidate for a virus survival trait, the host responds to VNN infection through  
493 various intercellular signalling molecules, including interferon [15]. Previously, VNN infection  
494 has shown induction of interferon expression and interferon-related genes in several fish  
495 species such as Atlantic halibut, turbot, grouper, Asian sea bass and European sea bass [43–  
496 45]. In most cells, interferon response is a major first line of defense against viral infection. Viral  
497 infection triggers production of interferon, which then bind to ubiquitously expressed receptors  
498 on nearby cells and induce a powerful transcriptional program comprising hundreds of antiviral  
499 interferon stimulated genes [46]. Focusing on the IFI6 interferon inducible protein, it is involved  
500 in several processes of regulation of various viral attacks [47]. For hepatitis B virus (HBV)  
501 replication, in vivo analysis based on the hydrodynamic injection of IFI6 expression plasmid  
502 along with HBV revealed significant inhibition of HBV DNA replication and gene expression [48].  
503 The same mechanism was also reported for the hepatitis C virus [49]. So, the resistance for  
504 VNN seems to be related to the regulation of the IFI6 protein positioned on the LG12.  
505 Further study of the molecular mechanisms underlying the functional impact of ZNDHH  
506 disruption in-vivo is needed to better understand the role and involvement of this gene in VNN  
507 resistance. In addition, functional approaches can be conducted on the IFI6 gene to reveal  
508 expression differentials between susceptible and resistant individuals.

## 509 **Conclusions**

510 In conclusion, we identified candidate genes associated with better resistance to VNN in  
511 European sea bass through sequence data analysis. From dense genotypic information, BSLMM  
512 approach were performed to refine association mapping analysis. Among the putative QTL  
513 identified, two QTL regions are shared between commercial populations including QTL

514 LG12\_QTL\_2, where IFI6, an interferon alpha induced protein, is positioned. For practical  
515 application in selective breeding, the SNP identified in LG12\_QTL\_2 has a high potential to  
516 perform successful marker-assisted selection, as we showed the susceptible and the resistant  
517 genotype had a similar effect on survival to VNN infection in several, independent populations.  
518 This is a major advance to improve the resistance of cultured populations of European sea bass  
519 to one of its main challenging diseases.

520

521

522

523

524

525

526

527

528

## 529 **Declarations**

### 530 **Ethics approval and consent to participate**

531 All infection challenges were carried out in accordance with the European guidelines (Directive  
532 2010–63-EU) and the corresponding French legislation. Animal experiment procedures were  
533 approved by the ethics committee on animal experimentation COMETH ANSES/ENVA/UPC  
534 No.16 and were authorized by the French Ministry of Higher Education, Research and  
535 Innovation under numbers 2017022816255366, 29/01/13-5 and 10/03/15-1.

### 536 **Consent for publication**

537 Not applicable

### 538 **Availability of data and materials**

539 The datasets used and/or analysed during the current study are available for scientific purposes  
540 from the corresponding author upon reasonable request.

### 541 **Competing interests**

542 JB, ABa, BI, JSB are running the commercial breeding programs which provided fish for the  
543 present experiment. RM, ABe, MB and PH are advising them for the design and operation of  
544 these breeding programs. The other authors declare no conflict of interest.

### 545 **Funding**

546 This work was financially supported by the GeneSea and MedMax projects (n° R FEA 4700 16  
547 FA 100 0005 and FEA470020FA1000002) funded by the French Government and the European  
548 Union (EMFF, European Maritime and Fisheries Fund) at the “Appels à projets Innovants”  
549 managed by France Agrimer.

550 **Authors' contributions**

551 ED performed the bioinformatic and statistical analyses and wrote the first draft of the paper.

552 Aba, JB, BI and JSB organized the breeding of European sea bass. ABe and MB organized the

553 data acquisition. ED, FA, MV, FP, ABe, MB, ABa, BI, PH and RM participated in the design of the

554 study. MV, FP and FA provided scientific supervision. All authors read and approved the final

555 manuscript.

556 **Acknowledgements**

557 The authors would like to thank (i) the Fortior Genetics platform (ANSES, Plouzané, France) for

558 the realization of the challenges, (ii) the INRAE genotyping platform Gentyane (INRAE,

559 Clermont-Ferrand, France) for the production of genotype data and (iii) the GeT-PlaGe genomic

560 platform (INRAE, Castanet-Tolosan, France).

561

## 562 References

- 563 1. Fernández Sánchez JL, Le Breton A, Brun E, Vendramin N, Spiliopoulos G, Furones D, et al.  
564 Assessing the economic impact of diseases in Mediterranean grow-out farms culturing  
565 European sea bass. *Aquaculture*. 2022;547:737530.
- 566 2. Lama R, Pereiro P, Valenzuela-Muñoz V, Gallardo-Escárate C, Tort L, Figueras A, et al. RNA-  
567 Seq analysis of European sea bass (*Dicentrarchus labrax* L.) infected with nodavirus reveals  
568 powerful modulation of the stress response. *Vet Res*. 2020;51:64.
- 569 3. Doan, Vandeputte M, Chatain B, Morin T, Allal F. Viral encephalopathy and retinopathy in  
570 aquaculture: a review. *J Fish Dis*. 2017;40:717–42.
- 571 4. Breuil G, Bonami JR, Pepin JF, Pichot Y. Viral infection (picorna-like virus) associated with  
572 mass mortalities in hatchery-reared sea-bass (*Dicentrarchus labrax*) larvae and juveniles.  
573 *Aquaculture*. 1991;97:109–16.
- 574 5. Vendramin N, Zrncic S, Padros F, Oraic D, Le Breton A, Zarza C, et al. Fish health  
575 in Mediterranean Aquaculture, past mistakes and future challenges. *Bulletin of The European*  
576 *Association of Fish Pathologists*. 2016;36:38–45.
- 577 6. Toffan A, Panzarin V, Toson M, Cecchettin K, Pascoli F. Water temperature affects  
578 pathogenicity of different betanodavirus genotypes in experimentally challenged  
579 *Dicentrarchus labrax*. *Diseases of Aquatic Organisms*. 2016;119:231–8.
- 580 7. Le Breton A, Grisez L, Sweetman J, Ollevier F. Viral nervous necrosis (VNN) associated with  
581 mass mortalities in cage-reared sea bass, *Dicentrarchus labrax* (L.). *J Fish Diseases*.  
582 1997;20:145–51.
- 583 8. Munday BL, Kwang J, Moody N. Betanodavirus infections of teleost fish: a review. *Journal of*  
584 *Fish Diseases*. 2002;25:127–42.
- 585 9. Costa JZ, Thompson KD. Understanding the interaction between Betanodavirus and its host  
586 for the development of prophylactic measures for viral encephalopathy and retinopathy. *Fish*  
587 *& Shellfish Immunology*. 2016;53:35–49.
- 588 10. Griot R, Allal F, Phocas F, Brard-Fudulea S, Morvezen R, Bestin A, et al. Genome-wide  
589 association studies for resistance to viral nervous necrosis in three populations of European  
590 sea bass (*Dicentrarchus labrax*) using a novel 57k SNP array DlabChip. *Aquaculture*.  
591 2021;530:735930.
- 592 11. Gonzalez-Silvera D, Guardiola FA, Espinosa C, Chaves-Pozo E, Esteban MÁ, Cuesta A.  
593 Recombinant nodavirus vaccine produced in bacteria and administered without purification  
594 elicits humoral immunity and protects European sea bass against infection. *Fish & Shellfish*  
595 *Immunology*. 2019;88:458–63.



- 596 12. Gomez-Casado E, Estepa A, Coll JM. A comparative review on European-farmed finfish  
597 RNA viruses and their vaccines. *Vaccine*. 2011;29:2657–71.
- 598 13. Buonocore F, Nuñez-Ortiz N, Picchietti S, Randelli E, Stocchi V, Guerra L, et al. Vaccination  
599 and immune responses of European sea bass (*Dicentrarchus labrax* L.) against betanodavirus.  
600 *Fish & Shellfish Immunology*. 2019;85:78–84.
- 601 14. Gjedrem T. Disease Resistant Fish and Shellfish Are within Reach: A Review. *JMSE*.  
602 2015;3:146–53.
- 603 15. Yang Z, Yue GH, Wong S-M. VNN disease and status of breeding for resistance to NNV in  
604 aquaculture. *Aquaculture and Fisheries*. 2022;7:147–57.
- 605 16. Gjedrem T, Robinson N. Advances by Selective Breeding for Aquatic Species: A Review.  
606 *Agric Sci*. 2014;05:1152–8.
- 607 17. Doan, Vandeputte M, Chatain B, Haffray P, Vergnet A, Breuil G, et al. Genetic variation of  
608 resistance to Viral Nervous Necrosis and genetic correlations with production traits in wild  
609 populations of the European sea bass (*Dicentrarchus labrax*). *Aquaculture*. 2017;478:1–8.
- 610 18. Palaiokostas C, Cariou S, Bestin A, Bruant J-S, Haffray P, Morin T, et al. Genome-wide  
611 association and genomic prediction of resistance to viral nervous necrosis in European sea  
612 bass (*Dicentrarchus labrax*) using RAD sequencing. *Genet Sel Evol*. 2018;50:30.
- 613 19. Wang L, Liu P, Huang S, Ye B, Chua E, Wan ZY, et al. Genome-Wide Association Study  
614 Identifies Loci Associated with Resistance to Viral Nervous Necrosis Disease in Asian Seabass.  
615 *Mar Biotechnol*. 2017;19:255–65.
- 616 20. Griot R, Allal F, Phocas F, Brard-Fudulea S, Morvezen R, Haffray P, et al. Optimization of  
617 Genomic Selection to Improve Disease Resistance in Two Marine Fishes, the European Sea  
618 Bass (*Dicentrarchus labrax*) and the Gilthead Sea Bream (*Sparus aurata*). *Frontiers in Genetics*.  
619 2021;12.
- 620 21. Correa K, Lhorente JP, Bassini L, López ME, Di Genova A, Maass A, et al. Genome wide  
621 association study for resistance to *Caligus rogercresseyi* in Atlantic salmon (*Salmo salar* L.)  
622 using a 50K SNP genotyping array. *Aquaculture*. 2017;472:61–5.
- 623 22. Zhou T, Liu S, Geng X, Jin Y, Jiang C, Bao L, et al. GWAS analysis of QTL for enteric  
624 septicemia of catfish and their involved genes suggest evolutionary conservation of a  
625 molecular mechanism of disease resistance. *Mol Genet Genomics*. 2017;292:231–42.
- 626 23. Vela-Avitúa S, Thorland I, Bakopoulos V, Papanna K, Dimitroglou A, Kottaras E, et al.  
627 Genetic Basis for Resistance Against Viral Nervous Necrosis: GWAS and Potential of Genomic  
628 Prediction Explored in Farmed European Sea Bass (*Dicentrarchus labrax*). *Frontiers in*  
629 *Genetics*. 2022;13.

- 630 24. Li H, Durbin R. Fast and accurate short read alignment with Burrows–Wheeler transform.  
631 *Bioinformatics*. 2009;25:1754–60.
- 632 25. Yun T, Li H, Chang P-C, Lin MF, Carroll A, McLean CY. Accurate, scalable cohort variant calls  
633 using DeepVariant and GLnexus. *Bioinformatics*. 2020;36:5582–9.
- 634 26. Danecek P, Bonfield JK, Liddle J, Marshall J, Ohan V, Pollard MO, et al. Twelve years of  
635 SAMtools and BCFtools. *GigaScience*. 2021;10:giab008.
- 636 27. Purcell S, Neale B, Todd-Brown K, Thomas L, Ferreira MAR, Bender D, et al. PLINK: a tool  
637 set for whole-genome association and population-based linkage analyses. *Am J Hum Genet*.  
638 2007;81:559–75.
- 639 28. Purcell S, Chang C. PLINK 1.9. URL <https://www.cog-genomics.org/plink2>. 2015.
- 640 29. Griot R, Allal F, Brard-Fudulea S, Morvezen R, Haffray P, Phocas F, et al. APIS: An auto-  
641 adaptive parentage inference software that tolerates missing parents. *Mol Ecol Resour*.  
642 2020;20:579–90.
- 643 30. Sargolzaei M, Chesnais JP, Schenkel FS. A new approach for efficient genotype imputation  
644 using information from relatives. *BMC Genomics*. 2014;15:478.
- 645 31. Zhou X, Carbonetto P, Stephens M. Polygenic Modeling with Bayesian Sparse Linear Mixed  
646 Models. *PLOS Genetics*. 2013;9:e1003264.
- 647 32. Barbieri MM, Berger JO. Optimal predictive model selection. *The Annals of Statistics*.  
648 2004;32:870–97.
- 649 33. Stephens M, Balding DJ. Bayesian statistical methods for genetic association studies. *Nat*  
650 *Rev Genet*. 2009;10:681–90.
- 651 34. Kass RE, Raftery AE. Bayes factors. *Journal of the American Statistical Association*.  
652 1995;90:773–95.
- 653 35. Michenet A, Barbat M, Saintilan R, Venot E, Phocas F. Detection of quantitative trait loci  
654 for maternal traits using high-density genotypes of Blonde d’Aquitaine beef cattle. *BMC*  
655 *Genet*. 2016;17:88.
- 656 36. Tine M, Kuhl H, Gagnaire P-A, Louro B, Desmarais E, Martins RST, et al. European sea bass  
657 genome and its variation provide insights into adaptation to euryhalinity and speciation. *Nat*  
658 *Commun*. 2014;5:5770.
- 659 37. Cingolani P, Platts A, Wang LL, Coon M, Nguyen T, Wang L, et al. A program for annotating  
660 and predicting the effects of single nucleotide polymorphisms, SnpEff. *Fly (Austin)*.  
661 2012;6:80–92.
- 662 38. McLaren W, Gil L, Hunt SE, Riat HS, Ritchie GRS, Thormann A, et al. The Ensembl Variant  
663 Effect Predictor. *Genome Biology*. 2016;17:122.

- 664 39. Faggion S, Bertotto D, Babbucci M, Dalla Rovere G, Franch R, Bovolenta M, et al.  
665 Resistance to viral nervous necrosis in European sea bass (*Dicentrarchus labrax* L.): heritability  
666 and relationships with body weight, cortisol concentration, and antibody titer. *Genetics*  
667 *Selection Evolution*. 2021;53:32.
- 668 40. Daetwyler HD, Capitan A, Pausch H, Stothard P, van Binsbergen R, Brøndum RF, et al.  
669 Whole-genome sequencing of 234 bulls facilitates mapping of monogenic and complex traits  
670 in cattle. *Nat Genet*. 2014;46:858–65.
- 671 41. Liu P, Wang L, Kwang J, Yue GH, Wong S-M. Transcriptome analysis of genes responding to  
672 NNV infection in Asian seabass epithelial cells. *Fish & Shellfish Immunology*. 2016;54:342–52.
- 673 42. Huang Y, Zhang Y, Zheng J, Wang L, Qin Q, Huang X. Metabolic profiles of fish nodavirus  
674 infection in vitro: RGNNV induced and exploited cellular fatty acid synthesis for virus infection.  
675 *Cellular Microbiology*. 2020;22:e13216.
- 676 43. Chen Y-M, Kuo C-E, Chen G-R, Kao Y-T, Zou J, Secombes CJ, et al. Functional analysis of an  
677 orange-spotted grouper (*Epinephelus coioides*) interferon gene and characterisation of its  
678 expression in response to nodavirus infection. *Developmental & Comparative Immunology*.  
679 2014;46:117–28.
- 680 44. Huang Y, Huang X, Cai J, OuYang Z, Wei S, Wei J, et al. Identification of orange-spotted  
681 grouper (*Epinephelus coioides*) interferon regulatory factor 3 involved in antiviral immune  
682 response against fish RNA virus. *Fish & Shellfish Immunology*. 2015;42:345–52.
- 683 45. Krishna Priya RS, Premraj A, Sivakumar KC, Sajeewan TP. Identification of two ISG15  
684 homologues involved in host immune response against RGNNV in Asian seabass (*Lates*  
685 *calcarifer*). *Fish and Shellfish Immunology Reports*. 2022;3:100054.
- 686 46. Wu X, Dao Thi VL, Huang Y, Billerbeck E, Saha D, Hoffmann H-H, et al. Intrinsic Immunity  
687 Shapes Viral Resistance of Stem Cells. *Cell*. 2018;172:423-438.e25.
- 688 47. Schoggins JW, Wilson SJ, Panis M, Murphy MY, Jones CT, Bieniasz P, et al. A diverse range  
689 of gene products are effectors of the type I interferon antiviral response. *Nature*.  
690 2011;472:481–5.
- 691 48. Sajid M, Ullah H, Yan K, He M, Feng J, Shereen MA, et al. The Functional and Antiviral  
692 Activity of Interferon Alpha-Inducible IFI6 Against Hepatitis B Virus Replication and Gene  
693 Expression. *Frontiers in Immunology*. 2021;12.
- 694 49. Qi H, Chu V, Wu NC, Chen Z, Truong S, Brar G, et al. Systematic identification of anti-  
695 interferon function on hepatitis C virus genome reveals p7 as an immune evasion protein.  
696 *Proceedings of the National Academy of Sciences*. 2017;114:2018–23.
- 697
- 698
